# Supplementary material for: Evaluation of Compost and Biochar to Mitigate Chlorpyrifos Pollution in Soil and Their Effect on Soil Enzyme Dynamics
Source: MDPI journal article supplement (doi:10.3390/su13179695), 2021-08-29
Supplement: s1 [file s1]

Supplementary material

# Evaluation of Compost and Biochar to Mitigate Chlorpyrifos Pollution in Soil and Their Effect on Soil Enzyme Dynamics

Humera Aziz <sup>1,\*</sup>, Xiukang Wang <sup>2,\*</sup>, Ghulam Murtaza <sup>3,\*</sup>, Ambreen Ashar <sup>4</sup>, Sarfraz Hussain <sup>5</sup>, Muhammad Abid <sup>6</sup>, Behzad Murtaza <sup>7</sup>, Muhammad Hamzah Saleem <sup>8</sup>, Sajid Fiaz <sup>9</sup> and Shafaqat Ali <sup>1,10</sup>

<sup>1</sup> Department of Environmental Sciences and Engineering, Government College University Faisalabad 38040, Pakistan; shafaqataligill@yahoo.com

<sup>2</sup> College of Life Sciences, Yan'an University, Yan'an 716000, China

<sup>3</sup> Institute of Soil and Environmental Sciences, University of Agriculture, Faisalabad 38000, Pakistan

<sup>4</sup> Department of Chemistry, Government College Women University Faisalabad 38860, Pakistan; ambreenashar2013@gmail.com

<sup>5</sup> Pesticide Quality Control Laboratory, Ayub Agricultural Research Institute, Faisalabad-38850, Pakistan; acpesticides@gmail.com

<sup>6</sup> Department of statistics, Government College University Faisalabad 38000, Pakistan; mabid@gcuf.edu.pk

<sup>7</sup> Department of Environmental Sciences, COMSATS University Islamabad, Vehari-Campus, Vehari 61100, Pakistan; behzadmurtaza@cuivehari.edu.pk

<sup>8</sup> College of Plant Science and Technology, Huazhong Agricultural University, Wuhan 430070, China; saleemhamza312@webmail.hzau.edu.cn

<sup>9</sup> Department of Plant Breeding and Genetics, The University of Haripur, Khyber Pakhtunkhwa 22620, Pakistan; sfiaz@uoh.edu.pk (S.F)

<sup>10</sup> Department of Biological Sciences and Technology, China Medical University, Taichung 40402, Taiwan; shafaqataligill@yahoo.com

\* Correspondence: humeraaziz.uaf@gmail.com (H.A.); wangxiukang@yau.edu.cn (X.W.); gmurtazauaf@gmail.com (G.M.)

**Table S1.** Selected physicochemical properties of the soil and amendments used in the study.

| Characteristic                                          | Soil            | Compost         | Biochar        |
|---------------------------------------------------------|-----------------|-----------------|----------------|
| Texture                                                 | Sandy clay loam | --              | --             |
| Sand (%)                                                | 56.4 ± 1.04     | --              | --             |
| Silt (%)                                                | 18.9 ± 0.98     | --              | --             |
| Clay (%)                                                | 24.7 ± 1.01     | --              | --             |
| pH <sub>w(1:10)</sub>                                   | 7.44 ± 0.10     | 6.25 ± 0.09     | 7.89 ± 0.08    |
| EC <sub>w(1:10)</sub> (dS m <sup>-1</sup> )             | 3.21 ± 0.08     | 3.10 ± 0.15     | 4.01 ± 0.08    |
| TSS (mmolc L <sup>-1</sup> )                            | 32 ± 0.2        | --              | --             |
| Total organic carbon (%)                                | 0.87 ± 0.03     | 35.36 ± 1.32    | 43.80 ± 1.65   |
| Specific surface area (m <sup>2</sup> g <sup>-1</sup> ) | 0.09 ± 0.008    | 31.37 ± 0.04    | 94.83 ± 0.09   |
| Pore size (nm)                                          | --              | 21 ± 0.32       | 15.0 ± 0.51    |
| Pore volume (cm <sup>3</sup> g <sup>-1</sup> )          | --              | 0.0035 ± 0.0001 | 0.090 ± 0.0001 |
| CEC cmol c kg <sup>-1</sup>                             | 5.2 ± 0.87      | 107.5 ± 4.34    | 85 ± 3.94      |

Values are presented as means ± standard error of three replicates, EC: Electrical conductivity, TSS: Total soluble salts, CEC: Cation exchange capacity, The specific surface area of soil and amendments represents the BET surface area calculated from N<sub>2</sub> adsorption isotherms at 77 K. The pore size and pore volume were computed using NOVA Win 2.0 software with N<sub>2</sub> adsorption data.

**Table S2.** Treatment description and their abbreviations used in the study.

| Treatment                                             | Abbreviations                                 |
|-------------------------------------------------------|-----------------------------------------------|
| Control                                               | CP <sub>0</sub> B <sub>0</sub> C <sub>0</sub> |
| CP 100 mg kg <sup>-1</sup>                            | CP <sub>100</sub>                             |
| CP100 mg kg <sup>-1</sup> + fresh compost 0.50%       | CP <sub>100</sub> + FC                        |
| CP100 mg kg <sup>-1</sup> + Wheat straw biochar 0.50% | CP <sub>100</sub> + WSB                       |

|                                                       |                                     |
|-------------------------------------------------------|-------------------------------------|
| CP 200 mg kg <sup>-1</sup>                            | CP <sub>200</sub>                   |
| CP200 mg kg <sup>-1</sup> + fresh compost 0.50%       | CP <sub>200</sub> +FC               |
| CP200 mg kg <sup>-1</sup> + Wheat straw biochar 0.50% | CP <sub>200</sub> B <sub>0.25</sub> |

**Table S3.** LSD- Main and Interaction effects (between time interval and treatments) for Chlorpyrifos degradation in non-sterilized and sterilized soil.

| Soil Type                    | Treatment   | Time Interval |            |            |            |            |            | Mean     |
|------------------------------|-------------|---------------|------------|------------|------------|------------|------------|----------|
|                              |             | 0 day         | 7 day      | 15 day     | 30 day     | 60 day     | 120 day    |          |
| Non-sterilized/original soil | CP 100      | 96.28 fgh     | 74.23 kl   | 69.00 lm   | 45.48 nop  | 23.54 qr   | 12.13 rs   | 53.44 E  |
|                              | CP100 + FC  | 95.14 f-i     | 56.34 mn   | 40.15 op   | 20.33 qr   | 5.37 s     | 1.59 s     | 36.49 F  |
|                              | CP100 + WSB | 96.09 f-i     | 80.00 jkl  | 87.34 hij  | 56.48 mn   | 33.02 pq   | 22.23 qr   | 62.53 D  |
|                              | CP200       | 194.41 a      | 135.11 c   | 120.21 de  | 108.00 ef  | 83.20 ijk  | 57.14 mn   | 116.34 B |
|                              | CP200 + FC  | 193.23 a      | 122.77 cd  | 105.08 fg  | 94.64 g-i  | 48.07 no   | 19.90 r    | 97.28 C  |
|                              | CP200 + WSB | 194.11 a      | 150.35 b   | 130.52 cd  | 119.36 de  | 93.09 ghi  | 79.00 jkl  | 127.74 A |
|                              | Mean        | 144.88 A      | 103.13 B   | 92.05 C    | 74.05 D    | 47.71 E    | 32.00 F    |          |
| Sterilized soil              | CP 100      | 97.14 jkl     | 86.04 k-q  | 81.31 m-q  | 71.21 qrs  | 62.71 rs   | 40.21 t    | 73.10 F  |
|                              | CP100 + FC  | 97.41 jkl     | 90.14 k-o  | 86.34 k-q  | 82.32 l-q  | 73.07 p-s  | 59.46 s    | 81.46 E  |
|                              | CP100 + WSB | 98.04 jk      | 96.02 j-m  | 91.37 k-n  | 87.21 k-p  | 80.14 n-q  | 75.43 o-r  | 88.04 D  |
|                              | CP200       | 194.12 ab     | 180.04 b-e | 162.21 fgh | 150.73 h   | 131.34 i   | 107.48 j   | 154.32 C |
|                              | CP200 + FC  | 195.44 a      | 185.00 a-d | 168.20 efg | 159.77 gh  | 149.32 h   | 133.86 i   | 165.27 B |
|                              | CP200 + WSB | 196.17 a      | 191.01 a-c | 183.07 a-e | 176.15 c-f | 169.97 d-g | 161.39 fgh | 179.63 A |
|                              | Mean        | 146.39 A      | 138.04 B   | 128.75 C   | 121.23 D   | 111.09 E   | 96.31 F    |          |

Data are shown as mean of three replicates. Treatments showing the same letters are statistically similar according to LSD test at  $p \leq 0.05$ . The capital letters show the main effects while, small letters represent interaction effects.

**Table S4.** Two-way Analysis of Variance Table for Chlorpyrifos degradation in non-sterilized soil.

| Source             | DF  | SS     | MS      | F      | P      |
|--------------------|-----|--------|---------|--------|--------|
| Interval           | 5   | 148307 | 29661.4 | 462.40 | 0.0000 |
| Treatment          | 5   | 121871 | 24374.2 | 379.97 | 0.0000 |
| Interval*Treatment | 25  | 13948  | 557.9   | 8.70   | 0.0000 |
| Error              | 72  | 4619   | 64.1    |        |        |
| Total              | 107 | 288744 |         |        |        |

Grand Mean 82.304, CV 9.73.

**Table S5.** Two-way Analysis of Variance Table for Chlorpyrifos degradation in sterilized soil.

| Source             | DF  | SS     | MS      | F      | P      |
|--------------------|-----|--------|---------|--------|--------|
| Interval           | 5   | 29904  | 5980.9  | 67.06  | 0.0000 |
| Treatment          | 5   | 205377 | 41075.4 | 460.57 | 0.0000 |
| Interval*Treatment | 25  | 5456   | 218.2   | 2.45   | 0.0017 |
| Error              | 72  | 6421   | 89.2    |        |        |
| Total              | 107 | 247158 |         |        |        |

Grand Mean 123.64 CV 7.64.

**Table S6.** LSD- Main and Interaction effects (between time interval and treatments) for soil enzymes activities.

| Soil Enzymes  | Treatment  | Time Interval |            |            |            |           |            | Mean     |
|---------------|------------|---------------|------------|------------|------------|-----------|------------|----------|
|               |            | 0 day         | 7 days     | 15 days    | 30 days    | 60 days   | 120 days   |          |
| Dehydrogenase | Control    | 15.530 bc     | 14.737 bcd | 14.710 bcd | 13.310 c-f | 11.567 ef | 14.500 bcd | 13.923 B |
|               | CP 100     | 2.983 n-r     | 2.807 0-r  | 2.550 o-r  | 3.330 m-q  | 7.540 h-j | 11.717 ef  | 5.624 D  |
|               | CP100 + FC | 20.077 a      | 15.013 b-d | 12.933 def | 13.813 b-e | 15.690 b  | 20.967 a   | 16.696 A |

|             |             |           |           |            |           |            |            |          |
|-------------|-------------|-----------|-----------|------------|-----------|------------|------------|----------|
|             | CP100 + WSB | 11.307 fg | 9.030 gh  | 6.533i-l   | 7.437 h-k | 8.420 hi   | 9.007 gh   | 8.541 C  |
|             | CP200       | 1.300 qr  | 1.203 r   | 1.023 r    | 1.983 pqr | 3.100 n-r  | 4.613 l-o  | 2.404 E  |
|             | CP200 + FC  | 7.753 hij | 6.653 i-l | 5.110 lmn  | 9.187 gh  | 11.290 fg  | 13.783 b-e | 9.425 C  |
|             | CP200 + WSB | 5.500 j-m | 4.500 l-p | 3.940 m-p  | 4.190 m-p | 5.200 k-n  | 6.513 i-l  | 5.069 D  |
|             | Mean        | 9.207 B   | 8.906 C   | 6.686 D    | 7.607 C   | 8.972 B    | 11.586 A   |          |
|             | Control     | 20.017 b  | 19.000 bc | 19.497 bc  | 18.970 bc | 17.753 cd  | 16.723 de  | 18.592 A |
|             | CP 100      | 5.090 p-t | 4.660 t-x | 4.063 stu  | 5.910 o-s | 6.017 o-r  | 7.007 no   | 5.617 E  |
|             | CP100 + FC  | 15.607 e  | 13.090 g  | 11.937 ghi | 13.517 fg | 15.237 ef  | 23.410 a   | 15.941 B |
|             | CP100 + WSB | 7.353 mno | 6.863 p-s | 6.447 nop  | 8.023 lmn | 9.100 klm  | 10.410 ijk | 8.267 D  |
|             | CP200       | 3.013 uv  | 2.503 yz  | 2.007 v    | 3.440 tuv | 3.913 tu   | 4.240 rstu | 3.323 F  |
| Urease      | CP200 + FC  | 9.313 jkl | 9.107 k-n | 8.913 klm  | 9.937 jk  | 11.050 hij | 12.680 gh  | 10.379 C |
|             | CP200 + WSB | 6.143 opq | 5.220 r-w | 4.410 q-u  | 6.833 nop | 7.020 no   | 7.720 l-o  | 6.425 E  |
|             | Mean        | 9.505 B   | 8.635 C   | 8.182 C    | 9.519 B   | 10.013 B   | 11.741 A   |          |
|             | Control     | 7.503 de  | 7.020 e-h | 7.670 de   | 8.250 cd  | 8.183 cd   | 8.920 bc   | 8.1053 B |
|             | CP 100      | 3.007 klm | 1.343 v-z | 0.653 pq   | 1.950 mno | 3.543 jk   | 4.483 hij  | 2.7273 D |
|             | CP100 + FC  | 8.133 cd  | 6.333 g-i | 5.973 fg   | 8.023 cd  | 9.837 b    | 14.013 a   | 9.1960 A |
|             | CP100 + WSB | 4.820 ghi | 4.037 m-p | 3.670 ijk  | 5.230 gh  | 5.943 fg   | 6.043 fg   | 5.1413 C |
|             | CP200       | 1.007 opq | 0.503 yz  | 0.190 q    | 1.220 n-q | 2.183 mno  | 3.023 klm  | 1.5247 E |
|             | CP200 + FC  | 3.420 jkl | 2.600 q-u | 2.317 lmn  | 5.013 gh  | 6.743 ef   | 7.937 cde  | 5.0860 C |
|             | CP200 + WSB | 1.923 mno | 1.807 t-x | 1.460 nop  | 2.940 klm | 3.023 klm  | 5.007 gh   | 2.8707 D |
| Phosphatase | Mean        | 4.2590 C  | 3.3776 D  | 3.1333 D   | 4.6610 C  | 5.6367 B   | 7.0610 A   |          |

Data are shown as mean of three replicates. Treatments showing the same letters are statistically similar according to LSD test at  $p \leq 0.05$ . The capital letters show the main effects while, small letters represent interaction effects.

**Table S7.** Two way Analysis of Variance Table for Dehydrogenase activity .

| Source             | DF  | SS      | MS      | F      | P      |
|--------------------|-----|---------|---------|--------|--------|
| Interval           | 5   | 319.72  | 63.943  | 31.43  | 0.0000 |
| Treatment          | 6   | 2804.45 | 467.409 | 229.73 | 0.0000 |
| Interval*Treatment | 30  | 317.09  | 10.570  | 5.20   | 0.0000 |
| Error              | 84  | 170.91  | 2.035   |        |        |
| Total              | 125 | 3612.17 |         |        |        |

Grand Mean 8.6123CV 16.56.

**Table S8.** Two-way Analysis of Variance Table for Urease activity.

| Source             | DF  | SS      | MS      | F      | P      |
|--------------------|-----|---------|---------|--------|--------|
| Interval           | 5   | 161.98  | 32.397  | 23.23  | 0.0000 |
| Treatment          | 6   | 3401.26 | 566.876 | 406.55 | 0.0000 |
| Interval*Treatment | 30  | 230.65  | 7.688   | 5.51   | 0.0000 |
| Error              | 84  | 117.13  | 1.394   |        |        |
| Total              | 125 | 3911.02 |         |        |        |

Grand Mean 9.7920 CV 12.30.

**Table S9.** Two-way Analysis of Variance Table for Phosphatase activity.

| Source             | DF  | SS      | MS      | F      | P      |
|--------------------|-----|---------|---------|--------|--------|
| Interval           | 5   | 227.84  | 45.549  | 85.63  | 0.0000 |
| Treatment          | 6   | 840.40  | 140.066 | 263.19 | 0.0000 |
| Interval*Treatment | 30  | 75.83   | 2.528   | 4.75   | 0.0000 |
| Error              | 84  | 44.70   | 0.532   |        |        |
| Total              | 125 | 1188.78 |         |        |        |

Grand Mean 4.6881CV 15.56.

**Table S10.** Completely randomized Analysis of Variance Table for Chlorpyrifos half lives in non-sterilized soil.

| Source    | DF | SS      | MS      | F    | P      |
|-----------|----|---------|---------|------|--------|
| Treatment | 5  | 10116.9 | 2023.39 | 45.0 | 0.0000 |
| Error     | 12 | 539.3   | 44.94   |      |        |
| Total     | 17 | 10656.3 |         |      |        |

Grand Mean 52.611 CV 12.74.

**Table S11.** Completely randomized Analysis of Variance Table for Chlorpyrifos half lives in sterilized soil.

| Source    | DF | SS     | MS      | F    | P      |
|-----------|----|--------|---------|------|--------|
| Treatment | 5  | 229643 | 45928.6 | 70.7 | 0.0000 |
| Error     | 12 | 7799   | 649.9   |      |        |
| Total     | 17 | 237442 |         |      |        |

Grand Mean 228.11 CV 11.18.
